# Supplementary material for: Older adults with heart failure and their perceptions of nurse-led pre-discharge education: A qualitative descriptive study
Source: Research Square preprint supplement (doi:10.21203/rs.3.rs-8439699/v1), 2026-02-02
Supplement: Supplementary file 1 [file 8ced9f47482db92c4fd522e1.docx]

**Semi-structured interview guide Study title**

**Perceptions of the effectiveness of nurse-led discharge education among older adults with heart failure**

**Introduction to participants**

**This interview aims to explore your thoughts, feelings, and concerns regarding the lifestyle and discharge education you received from nurses before discharge.**

**The purpose of this study is to understand how such education has been perceived and utilized in daily life and to obtain insights that may help improve nurse-led discharge education to support self-care behaviors and prevent rehospitalization.**

**The interview will take approximately 60 minutes.**

**If you feel unwell at any time during the interview, please inform the interviewer immediately, and the interview will be stopped.**

**With your permission, the interview will be audio-recorded using a digital audio recorder, and notes will be taken simultaneously.**

**Participant background information**

Age: (  ) years

Sex:

☐ Male

☐ Female

Number of hospitalizations due to heart failure: (  ) times

Types of discharge education received from nurses

(multiple answers allowed)

☐ Lifestyle guidance

☐ Medication guidance

☐ Fluid and salt restriction guidance

☐ Exercise guidance

☐ Other (please specify: ____________________)

**Interview questions**

Please share your thoughts on the following topics.

**Overall impressions**

1. Please tell us your impressions of the lifestyle guidance you received from nurses at the time of discharge.

**Experience during discharge education**

1. What overall impression did you have while receiving the discharge education?
2. What thoughts or feelings did you experience during the education sessions?

**SQ2-1.**

- Were there any aspects that you felt were difficult to understand or difficult to carry out?
- Please explain why you felt that way.

**SQ2-2.**

- Conversely, were there any aspects that you felt were easy to understand or helpful?
- Please explain why.

**Perceived usefulness for future life**

1. Did you feel that what you learned during discharge education would be useful for your future daily life or way of living?

**SQ3-1.**

- If yes, please describe what content you felt would be useful and why.

**SQ3-2.**

- If not, please explain the reasons.

**Closing**

This concludes the interview.
Thank you very much for taking the time to share your experiences despite your busy schedule.
As a token of appreciation, participants received a gift card after the interview.
